# Supplementary material for: A quantum chemistry investigation of a potential inhibitory drug against the dengue virus
Source: Royal Society of Chemistry journal article supplement (doi:10.1039/c6ra10121f), 2016-01-01
Supplement: c6ra10121f1.pdf [file c6ra10121f1.pdf]

## Supplemental Material

G. S. Ouriques,<sup>a</sup> J. F. Vianna,<sup>a</sup> J. X. Lima-Neto,<sup>a</sup> J. I. N. Oliveira,<sup>a</sup> P. W. Mauriz,<sup>b</sup>  
M. S. Vasconcelos,<sup>c</sup> E. W. S. Caetano,<sup>d</sup> V. N. Freire,<sup>e</sup> E. L. Albuquerque<sup>a</sup> and U. L. Fulco<sup>\*a</sup>

<sup>a</sup>*Departamento de Biofísica e Farmacologia,  
Universidade Federal do Rio Grande do Norte,  
59072-970, Natal-RN, Brazil.*

<sup>b</sup>*Departamento de Física, Instituto Federal de Educação,  
Ciência e Tecnologia do Maranhão,  
65030-005, São Luís-MA, Brazil.*

<sup>c</sup>*Departamento de Física, Escola de Ciência e Tecnologia,  
Universidade Federal do Rio Grande do Norte,  
59072-970, Natal-RN, Brazil.*

<sup>d</sup>*Departamento de Física, Instituto Federal de Educação,  
Ciência e Tecnologia do Ceará,  
60040-531, Fortaleza-CE, Brazil.*

<sup>e</sup>*Departamento de Física,  
Universidade Federal do Ceará, 60455-760,  
Fortaleza-CE, Brazil.*

| Residue       | Atomic group              | Binding pocket radius (Å) | Distance (Å) | Energy (Kcal/mol) |              |               |               | Residue       | Atomic group | Binding pocket radius (Å) | Distance (Å) | Energy (Kcal/mol) |              |               |               |
|---------------|---------------------------|---------------------------|--------------|-------------------|--------------|---------------|---------------|---------------|--------------|---------------------------|--------------|-------------------|--------------|---------------|---------------|
|               |                           |                           |              | $\epsilon=1$      | $\epsilon=2$ | $\epsilon=10$ | $\epsilon=40$ |               |              |                           |              | $\epsilon=1$      | $\epsilon=2$ | $\epsilon=10$ | $\epsilon=40$ |
| GLY151        | iv(C30)H; v(N4)H          | 2.0                       | 2.35; 1.89   | -14.19            | -9.88        | -6.63         | -6.15         | <i>MET75</i>  | iii(C22)NH3+ | 9.5                       | 9.15         | -17.08            | -15.94       | -15.57        | -15.47        |
| GLY153        | iii(C35)O                 | 2.0                       | 1.87         | -13.70            | -10.68       | -5.42         | -4.53         | <i>ALA127</i> | v(C41)H      | 9.5                       | 9.12         | -0.18             | -1.15        | 0.02          | 0.03          |
| <i>THR83</i>  | iii(C21)CH2; iv(C32)NH2+  | 2.5                       | 2.44; 3.89   | 2.55              | 2.47         | 0.59          | -0.29         | <b>LYS157</b> | iii(C22)NH3+ | 9.5                       | 9.72         | 36.33             | 20.89        | 4.74          | 1.66          |
| <i>MET84</i>  | iii(C22)NH3+              | 2.5                       | 2.30         | -30.46            | -29.61       | -24.86        | -23.44        | <i>THR34</i>  | v(C39)OH     | 10.0                      | 10.30        | 1.72              | 0.54         | 0.11          | 0.07          |
| <b>ARG85</b>  | iii(C22)NH3+              | 2.5                       | 2.04         | 79.82             | 54.12        | 14.11         | 4.98          | <i>GLY39</i>  | v(C39)H      | 10.0                      | 10.29        | -0.83             | -0.13        | -0.03         | -0.05         |
| <b>ASP129</b> | v(C45)NH2+                | 2.5                       | 2.25         | -66.89            | -43.52       | -14.26        | -7.68         | <i>PRO138</i> | v(C41)H      | 10.0                      | 9.90         | -0.71             | -0.25        | -0.14         | -0.13         |
| <i>PHE130</i> | v(N5)H                    | 2.5                       | 2.09         | -10.55            | -5.99        | -3.66         | -2.92         | <i>ASN158</i> | ii(C2)H      | 10.0                      | 9.96         | 5.79              | 1.68         | 0.42          | 0.16          |
| <i>TYR150</i> | v(C42)H                   | 2.5                       | 2.47         | -3.30             | -1.42        | -1.60         | -1.66         | <b>ARG24</b>  | v(C39)H      | 10.5                      | 10.57        | 29.58             | 17.06        | 3.96          | 0.92          |
| <i>ASN152</i> | iv(C32)NH2+               | 2.5                       | 2.15         | -27.09            | -26.75       | -18.63        | -16.47        | <i>GLY55</i>  | iv(C32)NH2+  | 10.5                      | 10.08        | 1.69              | 0.68         | 0.12          | 0.03          |
| <i>TYR161</i> | iii(C35)O; v(C45)NH2+     | 2.5                       | 1.97; 4.78   | -12.92            | -10.88       | -8.79         | -8.18         | <i>ALA70</i>  | iv(C32)NH2+  | 10.5                      | 10.32        | 0.10              | 1.99         | 0.59          | 0.10          |
| <i>GLY82</i>  | iv(C32)NH2+               | 3.0                       | 2.77         | -1.71             | -0.82        | -0.61         | -0.43         | <i>ILE77</i>  | iv(C32)NH2+  | 10.5                      | 9.89         | -3.00             | -1.41        | -0.38         | -0.15         |
| <i>HIS51</i>  | iv(C32)NH2+               | 3.0                       | 2.86         | -3.97             | -0.81        | 2.10          | 2.49          | <i>ILE98</i>  | v(C41)H      | 10.5                      | 10.36        | -3.09             | -1.16        | -0.05         | -0.02         |
| <i>PRO132</i> | ii(C14)H; v(C42)H         | 3.0                       | 2.64; 260    | -6.43             | -3.77        | -2.02         | -1.89         | <i>ILE123</i> | iv(C42)H     | 10.5                      | 10.39        | -1.12             | -0.47        | 0.01          | 0.05          |
| <i>GLY133</i> | v(C39)H                   | 3.0                       | 3.13         | 3.65              | 0.83         | 0.70          | 0.36          | <i>ALA125</i> | iii(C35)O    | 10.5                      | 10.46        | 0.82              | 0.25         | 0.24          | 0.07          |
| <i>THR134</i> | v(C39)H                   | 3.0                       | 3.06         | 4.09              | 1.02         | 0.80          | 0.76          | <i>ILE165</i> | v(C38)H      | 10.5                      | 10.20        | -0.81             | 0.29         | 0.07          | 0.03          |
| <i>VAL154</i> | iii(C21)H                 | 3.0                       | 2.50         | 5.21              | 3.57         | 1.27          | 0.57          | <b>LEU51</b>  | v(C39)H      | 11.0                      | 11.72        | -4.94             | -3.04        | -0.04         | 0.01          |
| <i>VAL155</i> | ii(C2)H                   | 3.0                       | 2.47         | -17.98            | -12.94       | -5.16         | -3.17         | <b>LYS26</b>  | v(C39)H      | 11.0                      | 11.83        | 29.97             | 16.10        | 3.64          | 0.87          |
| <b>ASP81</b>  | iv(C32)NH2+               | 3.5                       | 3.39         | -111.19           | -67.13       | -16.04        | -4.40         | <i>GLN27</i>  | v(C39)H      | 11.0                      | 11.59        | 1.12              | 0.39         | 0.08          | 0.00          |
| <i>VAL52</i>  | v(C39)H                   | 3.5                       | 4.27         | -0.71             | -0.39        | 0.05          | 0.14          | <b>LYS104</b> | v(C45)NH2+   | 11.0                      | 11.12        | 41.68             | 23.03        | 4.55          | 0.99          |
| <b>LYS131</b> | v(C45)NH2+                | 3.5                       | 5.53         | 48.46             | 21.83        | 4.52          | 1.06          | <i>PHE109</i> | v(C42)H      | 11.0                      | 10.88        | -0.79             | -0.19        | -0.09         | -0.08         |
| <i>ILE86</i>  | iii(C22)NH3+              | 4.0                       | 3.90         | -5.72             | -4.79        | -0.98         | -0.21         | <i>TYR23</i>  | v(C39)H      | 11.5                      | 11.33        | -0.07             | -0.08        | -0.16         | -0.10         |
| <i>TRP50</i>  | iv(C32)NH2+               | 4.0                       | 3.46         | 7.14              | 5.07         | 2.07          | 1.57          | <i>THR118</i> | iii(C22)NH3+ | 11.5                      | 11.08        | 0.98              | 0.56         | 0.15          | 0.03          |
| <b>ARG54</b>  | iv(C32)NH2+               | 4.0                       | 3.73         | 64.18             | 41.05        | 10.20         | 2.52          | <i>GLY124</i> | iii(C35)O    | 11.5                      | 11.51        | -2.11             | -1.00        | -0.30         | -0.12         |
| <b>ASP75</b>  | iv(C32)NH2+               | 4.0                       | 3.59         | -66.90            | -49.48       | -13.27        | -3.08         | <i>GLY148</i> | v(C41)H      | 11.5                      | 11.35        | 3.64              | 1.86         | 0.49          | 0.15          |
| <i>VAL36</i>  | v(C39)OH                  | 4.5                       | 4.49         | -4.16             | -3.61        | -2.96         | -2.81         | <i>GLN167</i> | iv(C32)NH2+  | 11.5                      | 11.44        | -2.15             | -1.85        | -0.53         | -0.16         |
| <i>VAL72</i>  | iv(C32)NH2+               | 4.5                       | 4.05         | -1.77             | -2.99        | -1.22         | -0.36         | <i>HIS72</i>  | iii(C18)H    | 12.0                      | 11.87        | -0.80             | -0.12        | -0.08         | -0.12         |
| <i>GLY37</i>  | v(C39)H                   | 5.0                       | 5.22         | 1.63              | 0.60         | 0.23          | 0.08          | <i>VAL3</i>   | iv(C32)NH2+  | 12.0                      | 11.82        | 0.05              | -1.36        | -0.12         | 0.10          |
| <i>MET49</i>  | iv(C29)H; v(N4)H          | 5.5                       | 5.38; 5.76   | -14.67            | -14.23       | -14.61        | -14.84        | <i>PHE46</i>  | v(C39)OH     | 12.0                      | 12.65        | -0.07             | -1.13        | -0.11         | -0.02         |
| <i>LEU128</i> | v(C41)H                   | 5.5                       | 5.28         | 0.38              | 0.13         | -0.04         | -0.07         | <i>HIS47</i>  | v(C39)H      | 12.0                      | 12.52        | -0.01             | 1.42         | 0.35          | 0.20          |
| <i>GLY136</i> | v(C38)H                   | 5.5                       | 5.27         | 4.67              | 1.27         | 0.14          | -0.01         | <i>ALA56</i>  | iv(C32)NH2+  | 12.0                      | 11.76        | -0.02             | -0.13        | 0.01          | 0.00          |
| <i>VAL162</i> | iii(C18)H                 | 5.5                       | 5.37         | -0.81             | -0.77        | -0.30         | -0.79         | <i>THR111</i> | v(C42)H      | 12.0                      | 11.77        | 1.17              | 0.07         | -0.04         | -0.04         |
| <i>VAL162</i> | v(C38)H                   | 5.5                       | 5.02         | -0.47             | -0.16        | -0.13         | -0.47         | <i>THR68</i>  | v(C42)H      | 12.5                      | 12.25        | 1.45              | 0.39         | -0.05         | 0.01          |
| <i>VAL78</i>  | iv(C32)NH2+               | 5.5                       | 6.36         | -4.16             | -0.79        | 0.42          | -0.05         | <i>GLY69</i>  | v(C42)H      | 12.5                      | 12.34        | 0.52              | 0.16         | 0.09          | 0.05          |
| <i>VAL38</i>  | v(C39)OH                  | 6.0                       | 6.51         | -1.69             | -0.99        | -0.30         | -0.20         | <i>VAL22</i>  | v(C39)H      | 12.5                      | 12.24; 12.28 | 0.03              | -0.08        | 0.08          | 0.10          |
| <i>SER137</i> | v(C38)H                   | 6.0                       | 6.10         | 0.39              | 0.20         | -0.25         | -0.17         | <i>LEU58</i>  | v(C39)H      | 12.5                      | 13.20        | 0.01              | 0.21         | 0.03          | 0.00          |
| <i>GLY164</i> | iii(C35)O                 | 6.0                       | 6.21         | -3.95             | 0.28         | 0.03          | -0.30         | <i>TRP69</i>  | iv(C32)NH2+  | 12.5                      | 12.42        | -0.07             | -0.46        | -0.04         | 0.00          |
| <i>ILE76</i>  | iii(C22)NH3+              | 6.5                       | 6.61         | 1.71              | 1.36         | 0.78          | 0.09          | <i>GLY103</i> | v(C39)H      | 12.5                      | 12.28        | -0.01             | -0.08        | -0.03         | 0.00          |
| <i>THR77</i>  | iii(C22)NH3+              | 6.5                       | 6.62         | -3.92             | -4.59        | -0.79         | -0.33         | <i>GLN117</i> | iii(C22)NH3+ | 12.5                      | 12.33        | -1.14             | -1.21        | -0.37         | -0.19         |
| <b>ASP79</b>  | iii(C22)NH3+; iv(C32)NH2+ | 6.5                       | 6.64; 6.92   | -110.09           | -64.97       | -14.45        | -3.64         | <i>LEU4</i>   | iv(C32)NH2+  | 13.0                      | 13.14        | -0.01             | 0.54         | -0.12         | 0.00          |
| <b>LYS74</b>  | iv(C32)NH2+               | 6.5                       | 6.44         | 50.34             | 28.53        | 5.83          | 1.34          | <i>VAL40</i>  | v(C39)H      | 13.0                      | 12.53        | -0.05             | -0.67        | -0.17         | -0.10         |
| <b>GLU101</b> | v(C38)H; v(C45)NH2+       | 6.5                       | 6.84; 6.91   | -43.20            | -23.06       | -5.01         | -1.22         | <i>TYR79</i>  | iv(C32)NH2+  | 13.0                      | 12.81        | -0.12             | -0.52        | -0.20         | -0.10         |
| <i>PRO102</i> | v(C39)H                   | 6.5                       | 6.93         | -0.82             | -0.24        | -0.04         | -0.18         | <i>TRP83</i>  | iv(C32)NH2+  | 13.0                      | 12.79        | 1.15              | 0.69         | 0.13          | -3.02         |
| <i>GLY159</i> | v(C45)NH2+                | 6.5                       | 6.65         | -1.67             | -0.39        | -0.10         | -0.23         | <i>PRO106</i> | v(C41)H      | 13.0                      | 12.65        | 0.00              | 0.36         | 0.10          | 0.10          |
| <b>ASP80</b>  | iv(C32)NH2+               | 7.5                       | 7.39         | -84.31            | -44.89       | -8.39         | -2.00         | <b>LYS107</b> | v(C45)NH2+   | 13.0                      | 12.59        | 27.93             | 15.54        | 3.52          | 0.85          |
| <i>GLY0</i>   | iv(C32)NH2+               | 7.5                       | 6.98         | -3.33             | -2.80        | -0.80         | -0.21         | <i>THR168</i> | iv(C32)NH2+  | 13.0                      | 13.29        | -2.47             | -0.66        | -0.18         | -0.05         |
| <i>GLN35</i>  | v(C39)H                   | 7.5                       | 7.12         | 2.47              | 0.93         | 0.18          | 0.05          | <i>THR52</i>  | v(C39)OH     | 13.5                      | 14.38        | -0.20             | -0.15        | -0.09         | -0.10         |

TABLE I: Interaction layer, minimal distance and MFCC binding energies between each one of the 131 amino acid residues of the serine protease of the dengue virus NS2B-NS3 surrounding by the inhibitor Bz-nKRR-H. The energy values were calculated within the GGA-D/PBE/DNP theory with  $\epsilon=1$ ,  $\epsilon=2$ ,  $\epsilon=10$  and  $\epsilon=40$ . We have adopted a bold red (blue) color for negatively (positively) charged residues. Besides, the residues with normal (italic) font represent those located in NS3 (NS2B) protein, and the shadows means the residues within the same pocket radius  $r$ .
